# Supplementary material for: Contributors to Wisconsin’s persistent black-white gap in life expectancy
Source: Springer Nature journal article supplement (doi:10.1186/s12889-019-7145-y), 2019-07-05
Supplement: MOESM1 [file 16900964]

**Additional file 1.** Age and cause decomposition of the 7.40-year difference in life expectancy between non-Hispanic black and non-Hispanic white males in Wisconsin, 1999-01

| Age groups    | Cerebrovascular disease | Diabetes    | Heart disease | HIV         | Homicide    | Hypertension | Influenza & pneumonia | Liver disease | Malignant neoplasms | Perinatal conditions | Respiratory disease | Suicide      | Unintentional injuries | All other causes | Total       |
|---------------|-------------------------|-------------|---------------|-------------|-------------|--------------|-----------------------|---------------|---------------------|----------------------|---------------------|--------------|------------------------|------------------|-------------|
| 0             | 0.00                    | 0.00        | 0.00          | 0.00        | 0.02        | 0.00         | 0.02                  | 0.00          | 0.00                | 0.47                 | 0.01                | 0.00         | 0.03                   | 0.33             | 0.89        |
| 1-4           | 0.00                    | 0.00        | 0.01          | 0.00        | 0.02        | 0.00         | 0.00                  | 0.00          | 0.00                | 0.00                 | 0.00                | 0.00         | 0.03                   | 0.01             | 0.07        |
| 5-9           | 0.00                    | 0.00        | 0.00          | 0.00        | 0.01        | 0.00         | 0.00                  | 0.00          | -0.01               | 0.00                 | 0.02                | 0.00         | 0.03                   | 0.00             | 0.04        |
| 10-14         | 0.00                    | 0.00        | 0.00          | 0.00        | 0.02        | 0.00         | 0.00                  | 0.00          | 0.01                | 0.00                 | 0.01                | 0.00         | 0.03                   | 0.03             | 0.09        |
| 15-19         | 0.00                    | 0.01        | 0.01          | 0.00        | 0.33        | 0.00         | 0.00                  | 0.00          | 0.01                | 0.00                 | 0.01                | 0.00         | -0.08                  | 0.00             | 0.29        |
| 20-24         | 0.00                    | 0.00        | 0.01          | 0.00        | 0.44        | 0.00         | 0.00                  | 0.00          | 0.01                | 0.00                 | 0.00                | -0.01        | -0.10                  | 0.11             | 0.44        |
| 25-29         | 0.00                    | 0.00        | 0.02          | 0.03        | 0.21        | 0.00         | 0.00                  | 0.01          | 0.00                | 0.00                 | 0.00                | -0.03        | -0.04                  | 0.03             | 0.22        |
| 30-34         | 0.00                    | 0.00        | 0.02          | 0.03        | 0.14        | 0.01         | 0.00                  | 0.00          | 0.02                | 0.00                 | 0.01                | -0.01        | 0.00                   | 0.08             | 0.29        |
| 35-39         | 0.01                    | 0.01        | 0.08          | 0.09        | 0.14        | 0.00         | 0.00                  | 0.01          | 0.02                | 0.00                 | 0.01                | -0.03        | 0.04                   | 0.07             | 0.44        |
| 40-44         | 0.04                    | 0.01        | 0.03          | 0.10        | 0.07        | 0.00         | 0.01                  | 0.01          | 0.12                | 0.00                 | 0.01                | -0.01        | 0.05                   | 0.12             | 0.56        |
| 45-49         | 0.06                    | 0.03        | 0.12          | 0.03        | 0.03        | 0.01         | 0.01                  | 0.04          | 0.10                | 0.00                 | 0.01                | 0.00         | 0.05                   | 0.13             | 0.62        |
| 50-54         | 0.04                    | 0.04        | 0.24          | 0.03        | 0.02        | 0.00         | 0.01                  | 0.04          | 0.15                | 0.00                 | 0.01                | -0.01        | 0.08                   | 0.15             | 0.81        |
| 55-59         | 0.07                    | 0.05        | 0.22          | 0.03        | 0.01        | 0.01         | 0.00                  | 0.01          | 0.24                | 0.00                 | 0.01                | -0.01        | 0.03                   | 0.14             | 0.83        |
| 60-64         | 0.05                    | 0.03        | 0.19          | 0.00        | 0.00        | 0.01         | 0.01                  | -0.02         | 0.24                | 0.00                 | 0.01                | 0.00         | 0.00                   | 0.11             | 0.62        |
| 65-69         | 0.09                    | 0.06        | 0.14          | 0.00        | 0.00        | 0.01         | 0.00                  | 0.01          | 0.22                | 0.00                 | 0.06                | 0.00         | 0.01                   | 0.10             | 0.69        |
| 70-74         | 0.04                    | 0.01        | 0.04          | 0.00        | 0.01        | 0.01         | 0.00                  | -0.01         | 0.15                | 0.00                 | 0.01                | 0.00         | 0.00                   | 0.10             | 0.36        |
| 75-79         | 0.04                    | 0.02        | 0.00          | 0.00        | 0.00        | 0.01         | 0.00                  | 0.00          | 0.12                | 0.00                 | -0.01               | 0.00         | -0.01                  | 0.02             | 0.18        |
| 80-84         | 0.03                    | 0.01        | 0.03          | 0.00        | 0.00        | 0.01         | 0.00                  | 0.00          | 0.08                | 0.00                 | -0.02               | 0.00         | 0.00                   | 0.05             | 0.19        |
| 85 +          | -0.01                   | 0.01        | -0.15         | 0.00        | 0.00        | 0.02         | 0.01                  | 0.00          | -0.01               | 0.00                 | 0.01                | 0.00         | -0.02                  | -0.08            | -0.24       |
| <b>Totals</b> | <b>0.45</b>             | <b>0.28</b> | <b>1.00</b>   | <b>0.35</b> | <b>1.48</b> | <b>0.10</b>  | <b>0.08</b>           | <b>0.10</b>   | <b>1.46</b>         | <b>0.47</b>          | <b>0.13</b>         | <b>-0.12</b> | <b>0.11</b>            | <b>1.51</b>      | <b>7.40</b> |

Note: Table entries represent the contribution, in years, to the total difference in life expectancy. Some of these values may be negative.
