# Supplementary material for: Contributors to Wisconsin’s persistent black-white gap in life expectancy
Source: Springer Nature journal article supplement (doi:10.1186/s12889-019-7145-y), 2019-07-05
Supplement: MOESM2 [file 16900964]

**Additional file 2.** Age and cause decomposition of the 6.96-year difference in life expectancy between non-Hispanic black and non-Hispanic white males in Wisconsin, 2007-09

| Age groups    | Cerebrovascular disease | Diabetes    | Heart disease | HIV         | Homicide    | Hypertension | Influenza & pneumonia | Liver disease | Malignant neoplasms | Perinatal conditions | Respiratory disease | Suicide      | Unintentional injuries | All other causes | Total       |
|---------------|-------------------------|-------------|---------------|-------------|-------------|--------------|-----------------------|---------------|---------------------|----------------------|---------------------|--------------|------------------------|------------------|-------------|
| 0             | 0.00                    | 0.00        | 0.02          | 0.00        | 0.05        | 0.00         | 0.01                  | 0.00          | 0.01                | 0.39                 | 0.00                | 0.00         | 0.06                   | 0.17             | 0.70        |
| 1-4           | 0.00                    | 0.00        | 0.01          | 0.00        | 0.02        | 0.00         | 0.00                  | 0.00          | 0.00                | 0.01                 | 0.00                | 0.00         | 0.01                   | 0.00             | 0.05        |
| 5-9           | 0.00                    | 0.00        | 0.00          | 0.00        | 0.00        | 0.00         | 0.00                  | 0.00          | -0.01               | 0.01                 | 0.01                | 0.00         | 0.00                   | 0.01             | 0.02        |
| 10-14         | 0.00                    | 0.00        | 0.00          | 0.00        | 0.00        | 0.00         | 0.00                  | 0.00          | 0.00                | 0.00                 | 0.01                | 0.01         | 0.00                   | -0.01            | 0.00        |
| 15-19         | 0.00                    | 0.00        | 0.00          | 0.00        | 0.14        | 0.00         | 0.00                  | 0.00          | -0.01               | 0.00                 | 0.01                | 0.02         | -0.04                  | 0.02             | 0.13        |
| 20-24         | 0.00                    | 0.00        | 0.05          | 0.00        | 0.25        | 0.00         | 0.00                  | 0.00          | 0.00                | 0.00                 | 0.01                | 0.02         | -0.10                  | 0.07             | 0.30        |
| 25-29         | 0.00                    | 0.00        | 0.02          | 0.01        | 0.24        | 0.00         | 0.02                  | 0.00          | -0.01               | 0.00                 | 0.00                | -0.03        | -0.04                  | 0.05             | 0.26        |
| 30-34         | 0.01                    | 0.02        | 0.02          | 0.01        | 0.17        | 0.01         | 0.01                  | 0.00          | 0.00                | 0.00                 | 0.00                | 0.00         | 0.02                   | 0.03             | 0.28        |
| 35-39         | 0.01                    | 0.00        | 0.09          | 0.04        | 0.06        | 0.00         | 0.00                  | 0.00          | 0.00                | 0.00                 | 0.02                | -0.03        | 0.05                   | 0.06             | 0.29        |
| 40-44         | 0.01                    | 0.00        | 0.10          | 0.05        | 0.03        | 0.00         | 0.01                  | -0.01         | 0.08                | 0.00                 | 0.01                | -0.04        | 0.08                   | 0.10             | 0.44        |
| 45-49         | 0.01                    | 0.02        | 0.13          | 0.02        | 0.06        | 0.02         | 0.01                  | 0.02          | 0.10                | 0.00                 | 0.02                | -0.04        | 0.06                   | 0.16             | 0.59        |
| 50-54         | 0.03                    | 0.00        | 0.18          | 0.03        | 0.01        | 0.01         | 0.01                  | 0.01          | 0.16                | 0.00                 | 0.01                | -0.03        | 0.10                   | 0.15             | 0.66        |
| 55-59         | 0.05                    | 0.02        | 0.15          | 0.02        | 0.03        | 0.03         | 0.01                  | 0.00          | 0.34                | 0.00                 | 0.00                | -0.02        | 0.05                   | 0.14             | 0.83        |
| 60-64         | 0.05                    | 0.05        | 0.16          | 0.00        | 0.02        | 0.00         | 0.01                  | 0.00          | 0.23                | 0.00                 | 0.02                | -0.02        | 0.02                   | 0.18             | 0.72        |
| 65-69         | 0.06                    | 0.01        | 0.17          | 0.01        | 0.02        | 0.00         | 0.00                  | 0.01          | 0.26                | 0.00                 | 0.01                | 0.00         | 0.03                   | 0.15             | 0.72        |
| 70-74         | 0.04                    | 0.03        | 0.14          | 0.00        | 0.00        | 0.00         | 0.00                  | 0.00          | 0.17                | 0.00                 | 0.03                | -0.01        | 0.01                   | 0.14             | 0.54        |
| 75-79         | 0.08                    | 0.03        | 0.06          | 0.00        | 0.00        | 0.03         | 0.00                  | -0.01         | 0.07                | 0.00                 | 0.01                | 0.00         | 0.00                   | 0.15             | 0.41        |
| 80-84         | 0.04                    | 0.01        | 0.00          | 0.00        | 0.00        | 0.00         | -0.01                 | 0.00          | 0.04                | 0.00                 | 0.01                | 0.00         | -0.01                  | 0.07             | 0.16        |
| 85 +          | 0.00                    | -0.01       | -0.14         | 0.00        | 0.00        | 0.00         | 0.01                  | 0.00          | -0.01               | 0.00                 | -0.02               | 0.00         | 0.00                   | 0.01             | -0.16       |
| <b>Totals</b> | <b>0.38</b>             | <b>0.17</b> | <b>1.15</b>   | <b>0.18</b> | <b>1.10</b> | <b>0.09</b>  | <b>0.07</b>           | <b>0.04</b>   | <b>1.43</b>         | <b>0.41</b>          | <b>0.15</b>         | <b>-0.17</b> | <b>0.29</b>            | <b>1.66</b>      | <b>6.96</b> |

Note: Table entries represent the contribution, in years, to the total difference in life expectancy. Some of these values may be negative.
