# Supplementary material for: Contributors to Wisconsin’s persistent black-white gap in life expectancy
Source: Springer Nature journal article supplement (doi:10.1186/s12889-019-7145-y), 2019-07-05
Supplement: MOESM3 [file 16900964]

**Additional file 3.** Age and cause decomposition of the 7.34-year difference in life expectancy between non-Hispanic black and non-Hispanic white males in Wisconsin, 2014-16

| Age groups    | Cerebrovascular disease | Diabetes    | Heart disease | HIV         | Homicide    | Hypertension | Influenza & pneumonia | Liver disease | Malignant neoplasms | Perinatal conditions | Respiratory disease | Suicide      | Unintentional injuries | All other causes | Total       |
|---------------|-------------------------|-------------|---------------|-------------|-------------|--------------|-----------------------|---------------|---------------------|----------------------|---------------------|--------------|------------------------|------------------|-------------|
| 0             | 0.00                    | 0.00        | 0.00          | 0.00        | 0.01        | 0.00         | 0.00                  | 0.00          | 0.00                | 0.36                 | 0.00                | 0.00         | 0.06                   | 0.25             | 0.69        |
| 1-4           | 0.00                    | 0.00        | 0.00          | 0.00        | -0.01       | 0.00         | 0.00                  | 0.00          | -0.01               | 0.01                 | 0.00                | 0.00         | 0.03                   | 0.02             | 0.05        |
| 5-9           | 0.00                    | 0.00        | 0.00          | 0.00        | 0.00        | 0.00         | 0.00                  | 0.00          | 0.01                | 0.00                 | 0.00                | 0.00         | 0.03                   | 0.03             | 0.08        |
| 10-14         | 0.00                    | 0.00        | 0.00          | 0.00        | 0.02        | 0.00         | 0.00                  | 0.00          | -0.01               | 0.00                 | 0.00                | 0.02         | 0.03                   | 0.03             | 0.08        |
| 15-19         | 0.00                    | 0.00        | 0.00          | 0.00        | 0.16        | 0.00         | 0.00                  | 0.00          | 0.00                | 0.00                 | 0.00                | -0.02        | 0.06                   | 0.01             | 0.21        |
| 20-24         | 0.00                    | 0.00        | 0.02          | 0.02        | 0.37        | 0.00         | 0.00                  | 0.00          | 0.01                | 0.00                 | 0.01                | -0.02        | -0.04                  | 0.01             | 0.37        |
| 25-29         | 0.00                    | 0.00        | 0.04          | 0.00        | 0.33        | 0.00         | 0.01                  | 0.00          | -0.01               | 0.00                 | 0.00                | -0.05        | -0.07                  | 0.02             | 0.28        |
| 30-34         | 0.00                    | 0.00        | 0.05          | 0.01        | 0.27        | 0.00         | 0.00                  | -0.01         | 0.01                | 0.00                 | 0.01                | -0.05        | -0.01                  | 0.05             | 0.33        |
| 35-39         | 0.00                    | 0.01        | 0.12          | 0.00        | 0.18        | 0.01         | 0.01                  | 0.00          | -0.01               | 0.00                 | 0.00                | -0.04        | 0.08                   | 0.09             | 0.46        |
| 40-44         | 0.04                    | 0.02        | 0.08          | 0.01        | 0.06        | 0.00         | -0.01                 | -0.01         | 0.00                | 0.00                 | 0.01                | -0.04        | 0.03                   | 0.06             | 0.25        |
| 45-49         | 0.01                    | 0.05        | 0.12          | 0.01        | 0.08        | 0.02         | 0.02                  | 0.01          | 0.07                | 0.00                 | 0.01                | -0.05        | 0.12                   | 0.08             | 0.55        |
| 50-54         | 0.03                    | 0.02        | 0.16          | 0.02        | 0.03        | 0.03         | 0.00                  | 0.03          | 0.18                | 0.00                 | 0.01                | -0.04        | 0.09                   | 0.09             | 0.66        |
| 55-59         | 0.05                    | 0.02        | 0.28          | 0.02        | 0.02        | 0.01         | 0.01                  | 0.05          | 0.31                | 0.00                 | 0.00                | -0.02        | 0.11                   | 0.17             | 1.02        |
| 60-64         | 0.04                    | 0.03        | 0.28          | 0.01        | 0.01        | 0.02         | 0.03                  | 0.03          | 0.35                | 0.00                 | 0.01                | -0.01        | 0.09                   | 0.12             | 1.02        |
| 65-69         | 0.02                    | 0.04        | 0.19          | 0.01        | 0.01        | 0.00         | 0.00                  | -0.01         | 0.27                | 0.00                 | 0.02                | -0.01        | 0.05                   | 0.19             | 0.79        |
| 70-74         | 0.04                    | 0.04        | 0.22          | 0.00        | 0.01        | 0.01         | 0.01                  | 0.00          | 0.19                | 0.00                 | 0.00                | -0.01        | 0.01                   | 0.12             | 0.63        |
| 75-79         | 0.02                    | 0.03        | 0.05          | 0.00        | 0.00        | 0.02         | 0.00                  | 0.00          | 0.00                | 0.00                 | 0.01                | 0.00         | -0.03                  | 0.03             | 0.12        |
| 80-84         | 0.01                    | 0.00        | 0.03          | 0.00        | 0.00        | 0.01         | 0.00                  | 0.00          | 0.09                | 0.00                 | -0.01               | 0.00         | 0.00                   | 0.01             | 0.12        |
| 85 +          | -0.02                   | 0.01        | -0.19         | 0.00        | 0.00        | 0.02         | -0.03                 | 0.00          | -0.05               | 0.00                 | -0.01               | 0.00         | -0.02                  | -0.06            | -0.35       |
| <b>Totals</b> | <b>0.24</b>             | <b>0.26</b> | <b>1.43</b>   | <b>0.11</b> | <b>1.56</b> | <b>0.14</b>  | <b>0.04</b>           | <b>0.08</b>   | <b>1.42</b>         | <b>0.37</b>          | <b>0.09</b>         | <b>-0.36</b> | <b>0.63</b>            | <b>1.33</b>      | <b>7.34</b> |

Note: Table entries represent the contribution, in years, to the total difference in life expectancy. Some of these values may be negative.
