# Supplementary material for: Contributors to Wisconsin’s persistent black-white gap in life expectancy
Source: Springer Nature journal article supplement (doi:10.1186/s12889-019-7145-y), 2019-07-05
Supplement: MOESM6 [file 16900964]

**Additional file 6.** Age and cause decomposition of the 5.61-year difference in life expectancy between non-Hispanic black and non-Hispanic white females in Wisconsin, 2014-16

| Age groups    | Cerebrovascular disease | Diabetes    | Heart disease | HIV         | Homicide    | Hypertension | Influenza & pneumonia | Liver disease | Malignant neoplasms | Perinatal conditions | Respiratory disease | Suicide      | Unintentional injuries | All other causes | Total       |
|---------------|-------------------------|-------------|---------------|-------------|-------------|--------------|-----------------------|---------------|---------------------|----------------------|---------------------|--------------|------------------------|------------------|-------------|
| 0             | 0.01                    | 0.00        | 0.01          | 0.00        | 0.02        | 0.00         | 0.00                  | 0.00          | 0.00                | 0.38                 | 0.00                | 0.00         | 0.02                   | 0.21             | 0.66        |
| 1-4           | 0.01                    | 0.00        | 0.01          | 0.00        | 0.02        | 0.00         | -0.01                 | 0.00          | 0.02                | 0.00                 | 0.00                | 0.00         | 0.01                   | 0.06             | 0.11        |
| 5-9           | 0.00                    | 0.00        | 0.01          | 0.00        | 0.00        | 0.00         | 0.01                  | 0.00          | 0.00                | 0.00                 | 0.01                | 0.00         | 0.00                   | -0.01            | 0.02        |
| 10-14         | 0.00                    | 0.00        | 0.00          | 0.00        | 0.01        | 0.00         | 0.01                  | 0.00          | -0.01               | 0.00                 | 0.01                | 0.00         | 0.00                   | 0.03             | 0.06        |
| 15-19         | 0.00                    | 0.00        | 0.00          | 0.00        | 0.06        | 0.00         | 0.00                  | 0.00          | 0.00                | 0.00                 | 0.01                | 0.00         | 0.00                   | 0.02             | 0.08        |
| 20-24         | 0.01                    | 0.01        | 0.01          | 0.00        | 0.04        | 0.00         | 0.00                  | 0.00          | -0.01               | 0.00                 | 0.00                | 0.00         | 0.01                   | 0.03             | 0.11        |
| 25-29         | 0.01                    | 0.00        | 0.01          | 0.00        | 0.03        | 0.00         | 0.00                  | 0.00          | -0.01               | 0.00                 | 0.00                | -0.01        | 0.03                   | 0.04             | 0.10        |
| 30-34         | 0.00                    | 0.00        | 0.05          | 0.00        | 0.02        | 0.00         | 0.00                  | -0.01         | 0.03                | 0.00                 | 0.00                | -0.02        | -0.01                  | 0.05             | 0.11        |
| 35-39         | 0.01                    | 0.01        | 0.05          | 0.01        | 0.01        | 0.00         | 0.00                  | 0.00          | 0.03                | 0.00                 | 0.00                | 0.00         | -0.01                  | 0.09             | 0.19        |
| 40-44         | 0.02                    | 0.02        | 0.08          | 0.01        | 0.01        | 0.00         | 0.01                  | 0.00          | 0.07                | 0.00                 | 0.00                | -0.02        | -0.01                  | 0.09             | 0.27        |
| 45-49         | 0.04                    | 0.02        | 0.13          | 0.01        | 0.01        | 0.01         | 0.00                  | 0.02          | 0.04                | 0.00                 | 0.01                | -0.01        | 0.08                   | 0.16             | 0.53        |
| 50-54         | 0.06                    | 0.01        | 0.21          | 0.02        | 0.01        | 0.02         | 0.01                  | 0.02          | 0.13                | 0.00                 | 0.03                | -0.02        | 0.06                   | 0.10             | 0.65        |
| 55-59         | 0.07                    | 0.03        | 0.17          | 0.00        | 0.00        | 0.01         | 0.01                  | 0.02          | 0.16                | 0.00                 | 0.05                | -0.01        | 0.02                   | 0.16             | 0.67        |
| 60-64         | 0.05                    | 0.06        | 0.17          | 0.00        | 0.00        | 0.01         | 0.01                  | 0.01          | 0.15                | 0.00                 | 0.05                | -0.01        | 0.03                   | 0.20             | 0.73        |
| 65-69         | 0.04                    | 0.05        | 0.18          | 0.00        | 0.00        | 0.04         | 0.01                  | -0.01         | 0.23                | 0.00                 | 0.00                | 0.00         | 0.02                   | 0.15             | 0.69        |
| 70-74         | 0.10                    | 0.07        | 0.13          | 0.00        | 0.00        | 0.03         | 0.00                  | 0.00          | 0.16                | 0.00                 | 0.02                | 0.00         | -0.01                  | 0.15             | 0.64        |
| 75-79         | 0.03                    | 0.05        | 0.11          | 0.00        | 0.00        | 0.02         | 0.01                  | 0.00          | 0.01                | 0.00                 | -0.01               | 0.00         | 0.00                   | 0.17             | 0.38        |
| 80-84         | 0.03                    | 0.04        | 0.06          | 0.00        | 0.00        | 0.00         | -0.01                 | 0.00          | 0.01                | 0.00                 | -0.03               | 0.00         | -0.01                  | 0.04             | 0.13        |
| 85 +          | -0.07                   | 0.04        | -0.27         | 0.00        | 0.00        | 0.00         | -0.05                 | 0.00          | -0.01               | 0.00                 | -0.05               | 0.00         | -0.10                  | -0.03            | -0.53       |
| <b>Totals</b> | <b>0.40</b>             | <b>0.41</b> | <b>1.12</b>   | <b>0.05</b> | <b>0.24</b> | <b>0.13</b>  | <b>0.02</b>           | <b>0.05</b>   | <b>1.00</b>         | <b>0.38</b>          | <b>0.08</b>         | <b>-0.11</b> | <b>0.13</b>            | <b>1.71</b>      | <b>5.61</b> |

Note: Table entries represent the contribution, in years, to the total difference in life expectancy. Some of these values may be negative.
