# Supplementary material for: Contributors to Wisconsin’s persistent black-white gap in life expectancy
Source: Springer Nature journal article supplement (doi:10.1186/s12889-019-7145-y), 2019-07-05
Supplement: MOESM7 [file 16900964]

**Additional file 7.** Age and cause decomposition of the 0.24-year difference in life expectancy between non-Hispanic black males in Wisconsin and non-Hispanic black males in the U.S., 2007-09

| Age groups    | Cerebrovascular disease | Diabetes     | Heart disease | HIV          | Homicide     | Hypertension | Influenza & pneumonia | Liver disease | Malignant neoplasms | Perinatal conditions | Respiratory disease | Suicide     | Unintentional injuries | All other causes | Total       |
|---------------|-------------------------|--------------|---------------|--------------|--------------|--------------|-----------------------|---------------|---------------------|----------------------|---------------------|-------------|------------------------|------------------|-------------|
| 0             | -0.01                   | 0.00         | 0.01          | 0.00         | 0.04         | 0.00         | 0.00                  | 0.00          | 0.01                | -0.01                | 0.00                | 0.00        | 0.04                   | -0.02            | 0.05        |
| 1-4           | 0.00                    | 0.00         | 0.00          | 0.00         | 0.01         | 0.00         | 0.00                  | 0.00          | 0.00                | 0.00                 | 0.00                | 0.00        | -0.01                  | -0.02            | -0.02       |
| 5-9           | 0.00                    | 0.00         | 0.00          | 0.00         | 0.00         | 0.00         | 0.00                  | 0.00          | 0.00                | 0.01                 | 0.00                | 0.00        | 0.00                   | 0.00             | 0.00        |
| 10-14         | 0.00                    | 0.00         | 0.00          | 0.00         | -0.01        | 0.00         | 0.00                  | 0.00          | 0.00                | 0.00                 | 0.01                | 0.01        | -0.01                  | -0.02            | -0.03       |
| 15-19         | 0.00                    | 0.00         | -0.01         | 0.00         | -0.03        | 0.00         | 0.00                  | 0.00          | -0.01               | 0.00                 | 0.00                | 0.03        | 0.00                   | 0.01             | -0.02       |
| 20-24         | 0.00                    | 0.00         | 0.02          | -0.01        | -0.02        | 0.00         | 0.00                  | 0.00          | 0.00                | 0.00                 | 0.00                | 0.04        | -0.05                  | 0.04             | 0.01        |
| 25-29         | 0.00                    | -0.01        | -0.01         | -0.02        | 0.01         | 0.00         | 0.01                  | 0.00          | -0.02               | 0.00                 | 0.00                | 0.00        | -0.02                  | 0.01             | -0.05       |
| 30-34         | 0.00                    | 0.01         | -0.02         | -0.02        | 0.01         | 0.00         | 0.00                  | 0.00          | 0.00                | 0.00                 | 0.00                | 0.01        | 0.01                   | -0.02            | -0.03       |
| 35-39         | 0.00                    | -0.01        | 0.02          | -0.02        | -0.03        | 0.00         | -0.01                 | 0.00          | -0.01               | 0.00                 | 0.01                | 0.00        | 0.03                   | -0.01            | -0.03       |
| 40-44         | -0.01                   | -0.01        | 0.00          | -0.03        | -0.02        | 0.00         | 0.01                  | 0.00          | 0.04                | 0.00                 | 0.01                | -0.01       | 0.06                   | 0.01             | 0.05        |
| 45-49         | -0.01                   | 0.00         | 0.01          | -0.04        | 0.02         | 0.00         | 0.00                  | 0.02          | 0.03                | 0.00                 | 0.02                | 0.00        | 0.04                   | 0.05             | 0.12        |
| 50-54         | -0.01                   | -0.03        | 0.00          | -0.03        | -0.01        | -0.01        | 0.00                  | 0.01          | 0.02                | 0.00                 | 0.00                | 0.00        | 0.06                   | 0.00             | 0.00        |
| 55-59         | -0.01                   | -0.02        | -0.06         | -0.03        | 0.01         | 0.01         | 0.00                  | -0.01         | 0.14                | 0.00                 | -0.01               | 0.00        | 0.02                   | -0.03            | 0.03        |
| 60-64         | -0.01                   | 0.01         | -0.08         | -0.04        | 0.01         | -0.03        | -0.01                 | 0.00          | 0.08                | 0.00                 | 0.02                | -0.01       | 0.02                   | 0.05             | 0.01        |
| 65-69         | 0.00                    | -0.04        | -0.04         | -0.01        | 0.01         | -0.02        | -0.01                 | 0.00          | 0.12                | 0.00                 | 0.00                | 0.01        | 0.03                   | 0.02             | 0.07        |
| 70-74         | -0.01                   | 0.00         | -0.02         | -0.01        | 0.00         | -0.01        | -0.01                 | 0.00          | 0.07                | 0.00                 | 0.03                | 0.00        | 0.01                   | 0.04             | 0.07        |
| 75-79         | 0.04                    | 0.00         | -0.06         | 0.00         | 0.00         | 0.01         | -0.01                 | -0.01         | 0.01                | 0.00                 | 0.02                | 0.00        | 0.00                   | 0.08             | 0.08        |
| 80-84         | 0.02                    | -0.01        | -0.05         | 0.00         | 0.00         | -0.01        | -0.01                 | 0.00          | 0.00                | 0.00                 | 0.03                | 0.00        | 0.00                   | 0.04             | 0.01        |
| 85 +          | 0.00                    | -0.02        | -0.11         | 0.00         | 0.00         | -0.02        | 0.02                  | 0.01          | -0.04               | 0.00                 | 0.00                | 0.00        | 0.04                   | 0.03             | -0.09       |
| <b>Totals</b> | <b>0.00</b>             | <b>-0.15</b> | <b>-0.41</b>  | <b>-0.27</b> | <b>-0.01</b> | <b>-0.07</b> | <b>-0.03</b>          | <b>0.01</b>   | <b>0.45</b>         | <b>0.00</b>          | <b>0.12</b>         | <b>0.08</b> | <b>0.26</b>            | <b>0.24</b>      | <b>0.24</b> |

Note: Table entries represent the contribution, in years, to the total difference in life expectancy. Some of these values may be negative. To avoid double counting non-Hispanic blacks in Wisconsin, we removed them from U.S. data in these estimates.
