# Supplementary material for: Contributors to Wisconsin’s persistent black-white gap in life expectancy
Source: Springer Nature journal article supplement (doi:10.1186/s12889-019-7145-y), 2019-07-05
Supplement: MOESM8 [file 16900964]

**Additional file 8.** Age and cause decomposition of the 2.03-year difference in life expectancy between non-Hispanic black males in Wisconsin and non-Hispanic black males in the U.S., 2014-16

| Age groups    | Cerebrovascular disease | Diabetes     | Heart disease | HIV          | Homicide    | Hypertension | Influenza & pneumonia | Liver disease | Malignant neoplasms | Perinatal conditions | Respiratory disease | Suicide      | Unintentional injuries | All other causes | Total       |
|---------------|-------------------------|--------------|---------------|--------------|-------------|--------------|-----------------------|---------------|---------------------|----------------------|---------------------|--------------|------------------------|------------------|-------------|
| 0             | 0.00                    | 0.00         | 0.00          | 0.00         | 0.00        | 0.00         | 0.00                  | 0.00          | 0.00                | 0.08                 | 0.00                | 0.00         | 0.02                   | 0.14             | 0.23        |
| 1-4           | 0.00                    | 0.00         | -0.01         | 0.00         | -0.02       | 0.00         | 0.00                  | 0.00          | -0.01               | 0.00                 | 0.00                | 0.00         | 0.01                   | 0.00             | -0.02       |
| 5-9           | 0.00                    | 0.00         | 0.00          | 0.00         | -0.01       | 0.00         | 0.00                  | 0.00          | 0.00                | 0.00                 | 0.00                | 0.00         | 0.02                   | 0.03             | 0.04        |
| 10-14         | 0.00                    | 0.00         | 0.00          | 0.00         | 0.01        | 0.00         | 0.00                  | 0.00          | -0.01               | 0.00                 | 0.00                | 0.02         | 0.02                   | 0.02             | 0.05        |
| 15-19         | 0.00                    | 0.00         | -0.01         | 0.00         | 0.00        | 0.00         | 0.00                  | 0.00          | 0.00                | 0.00                 | 0.00                | 0.01         | 0.05                   | 0.00             | 0.05        |
| 20-24         | 0.00                    | 0.00         | 0.00          | 0.01         | 0.10        | 0.00         | 0.00                  | 0.00          | 0.00                | 0.00                 | 0.00                | 0.01         | -0.01                  | -0.02            | 0.10        |
| 25-29         | 0.00                    | -0.01        | 0.02          | -0.01        | 0.11        | 0.00         | 0.00                  | 0.00          | 0.00                | 0.00                 | 0.00                | -0.02        | -0.01                  | -0.01            | 0.07        |
| 30-34         | 0.00                    | -0.01        | 0.00          | -0.01        | 0.10        | 0.00         | 0.00                  | 0.00          | 0.01                | 0.00                 | 0.00                | -0.02        | 0.01                   | 0.00             | 0.08        |
| 35-39         | -0.01                   | 0.00         | 0.04          | -0.02        | 0.06        | 0.00         | 0.01                  | 0.00          | -0.02               | 0.00                 | 0.00                | 0.00         | 0.08                   | 0.02             | 0.16        |
| 40-44         | 0.02                    | 0.00         | -0.02         | -0.01        | 0.00        | 0.00         | -0.01                 | 0.00          | -0.01               | 0.00                 | 0.00                | -0.01        | 0.01                   | -0.01            | -0.04       |
| 45-49         | -0.01                   | 0.02         | -0.01         | -0.02        | 0.04        | 0.01         | 0.01                  | 0.02          | 0.03                | 0.00                 | 0.01                | -0.01        | 0.09                   | 0.00             | 0.17        |
| 50-54         | 0.00                    | -0.01        | 0.02          | -0.01        | 0.00        | 0.01         | -0.01                 | 0.03          | 0.09                | 0.00                 | 0.01                | -0.01        | 0.06                   | 0.00             | 0.19        |
| 55-59         | 0.00                    | -0.01        | 0.09          | -0.01        | 0.01        | -0.01        | 0.00                  | 0.04          | 0.17                | 0.00                 | 0.00                | 0.00         | 0.07                   | 0.04             | 0.38        |
| 60-64         | -0.01                   | -0.01        | 0.07          | -0.01        | 0.00        | 0.00         | 0.01                  | 0.02          | 0.17                | 0.00                 | 0.00                | 0.00         | 0.05                   | -0.02            | 0.27        |
| 65-69         | -0.02                   | 0.00         | 0.00          | 0.00         | 0.00        | -0.02        | -0.01                 | -0.01         | 0.13                | 0.00                 | 0.01                | 0.00         | 0.04                   | 0.07             | 0.19        |
| 70-74         | -0.01                   | 0.00         | 0.07          | -0.01        | 0.01        | -0.01        | -0.01                 | 0.00          | 0.09                | 0.00                 | 0.01                | 0.00         | 0.01                   | 0.02             | 0.17        |
| 75-79         | -0.02                   | 0.00         | -0.04         | 0.00         | 0.00        | 0.00         | -0.01                 | 0.00          | -0.03               | 0.00                 | 0.02                | 0.00         | -0.01                  | -0.03            | -0.12       |
| 80-84         | -0.01                   | -0.02        | -0.01         | 0.00         | 0.00        | 0.00         | -0.01                 | 0.00          | 0.09                | 0.00                 | 0.01                | 0.00         | 0.01                   | -0.01            | 0.05        |
| 85 +          | -0.02                   | 0.00         | -0.08         | 0.00         | 0.00        | 0.01         | -0.02                 | 0.00          | -0.02               | 0.00                 | 0.04                | 0.00         | 0.04                   | 0.07             | 0.02        |
| <b>Totals</b> | <b>-0.10</b>            | <b>-0.05</b> | <b>0.13</b>   | <b>-0.10</b> | <b>0.43</b> | <b>-0.02</b> | <b>-0.05</b>          | <b>0.09</b>   | <b>0.69</b>         | <b>0.08</b>          | <b>0.09</b>         | <b>-0.04</b> | <b>0.56</b>            | <b>0.30</b>      | <b>2.03</b> |

Note: Table entries represent the contribution, in years, to the total difference in life expectancy. Some of these values may be negative. To avoid double counting non-Hispanic blacks in Wisconsin, we removed them from U.S. data in these estimates.
